# Supplementary material for: Lack of Neuroprotective Effects of High-Density Lipoprotein Therapy in Stroke under Acute Hyperglycemic Conditions
Source: MDPI journal article supplement (doi:10.3390/molecules26216365), 2021-10-21
Supplement: s1 [file s1]

## Supplementary Materials

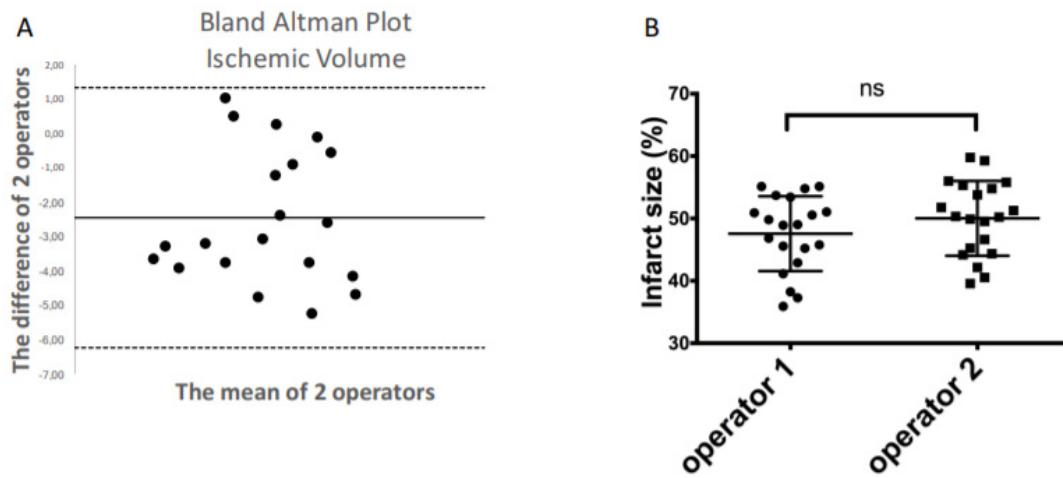

**Figure S1.** (A) Bland Altman Plot: the bias of measurement of the 2 operators was  $-2.46\%$ . Upper limit of agreement (LOA):  $1.33\%$ . Lower LOA:  $-6.25\%$ . There was a good correlation between the 2 operators for the analysis of the infarct volume. (B) Comparison of infarct size according to the assessment of the two operators. There was no statistical difference between the 2 operators regarding the assessment of infarct size. ( $47.56 \pm 1.34\%$  vs  $50.02 \pm 1.3\%$   $p = 0.20$ ). Data are represented by means  $\pm$  SD.
